# Supplementary material
Source: publisher figshare collection journal article supplement (https://tandf.figshare.com/ndownloader/files/14126219)
Supplement: Supplementary file 1 [file 14126219]

## Supporting Information

### **Artificial cationic peptides that increase nuclease resistance of siRNA without disturbing RNAi activity**

Yusuke Maeda<sup>a</sup>, Rintaro Iwata Hara<sup>a,b</sup>, Kazutaka Nishina<sup>b</sup>, Kie Yoshida-Tanaka<sup>b</sup>, Taiichi Sakamoto<sup>c</sup>, Takanori Yokota<sup>b</sup> and Takeshi Wada<sup>a</sup>

*<sup>a</sup>Faculty of Pharmaceutical Sciences, Tokyo University of Science, 2641 Yamazaki, Noda, Chiba 278-8510, Japan*

*<sup>b</sup>Department of Neurology and Neurological Science, Graduate School of Medical and Dental Sciences, Tokyo Medical and Dental University, 1-5-45 Yushima, Bunkyo-ku, Tokyo 113-8519, Japan*

*<sup>c</sup>Faculty of Advanced Engineering, Chiba Institute of Technology, 2-17-1 Tsudanuma, Narashino, Chiba, 275-0016, Japan*

## Table of contents

Fluorescence anisotropy

2

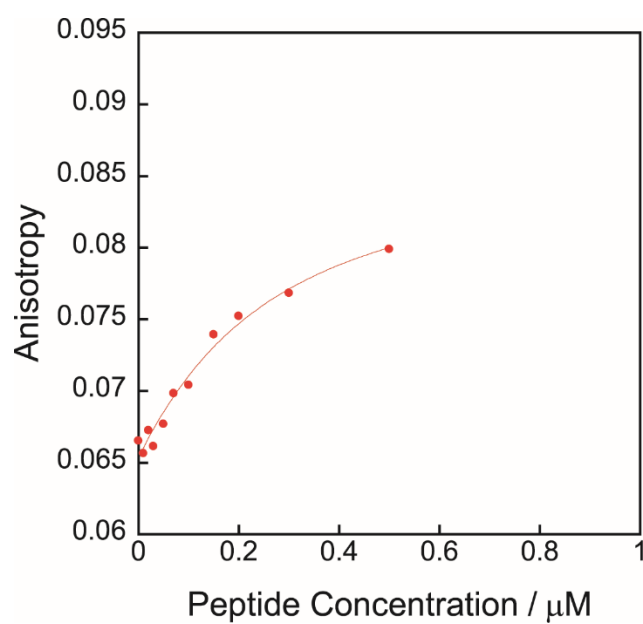

$$K_d = 0.21 \pm 0.09 \mu\text{M}$$

Fig. S1 Fluorescence anisotropy of 100 nM of (FAM-rCGCGAAUUCGCG)<sub>2</sub> was titrated by increasing concentration of A1.

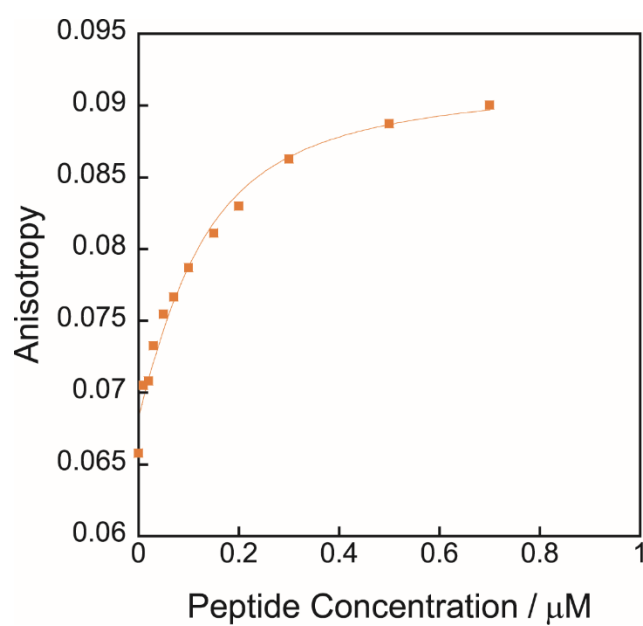

$$K_d = 0.071 \pm 0.02 \mu\text{M}$$

Fig. S2 Fluorescence anisotropy of 100 nM of (FAM-rCGCGAAUUCGCG)<sub>2</sub> was titrated by increasing concentration of A2.

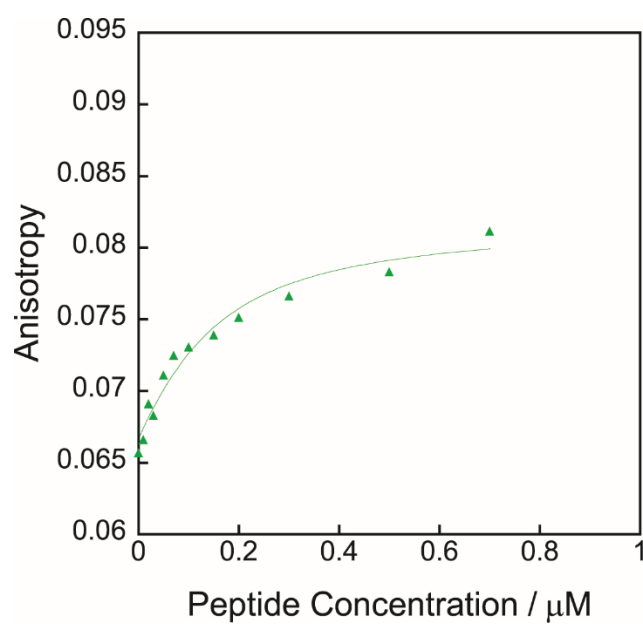

$$K_d = 0.097 \pm 0.04 \mu\text{M}$$

Fig. S3 Fluorescence anisotropy of 100 nM of (FAM-rCGCGAAUUCGCG)<sub>2</sub> was titrated by increasing concentration of A3.

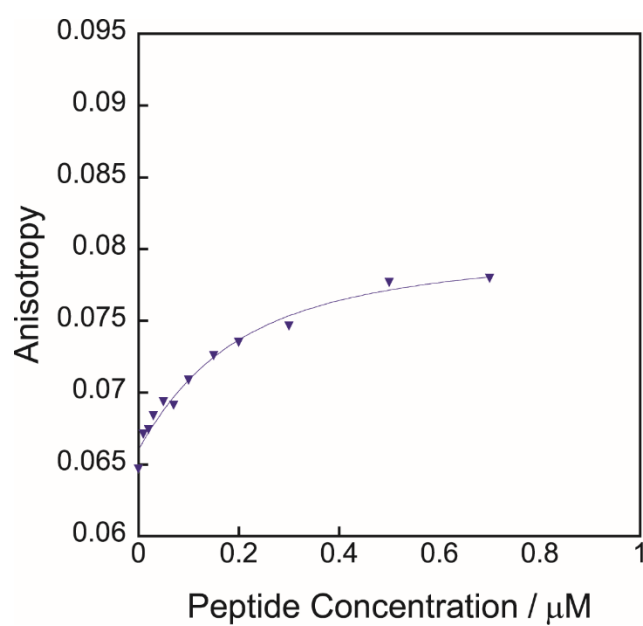

$$K_d = 0.14 \pm 0.04 \mu\text{M}$$

Fig. S4 Fluorescence anisotropy of 100 nM of (FAM-rCGCGAAUUCGCG)<sub>2</sub> was titrated by increasing concentration of A4.
